# Supplementary material
Source: PubMed Central journal article supplement (PMC5985339)
Supplement: mmc1.pdf [file mmc1.pdf]

**The American Journal of Human Genetics, Volume 102**

**Supplemental Data**

**PheWAS and Beyond: The Landscape of Associations  
with Medical Diagnoses and Clinical Measures  
across 38,662 Individuals from Geisinger**

**Anurag Verma, Anastasia Lucas, Shefali S. Verma, Yu Zhang, Navya Josyula, Anqa Khan, Dustin N. Hartzel, Daniel R. Lavage, Joseph Leader, Marylyn D. Ritchie, and Sarah A. Pendergrass**

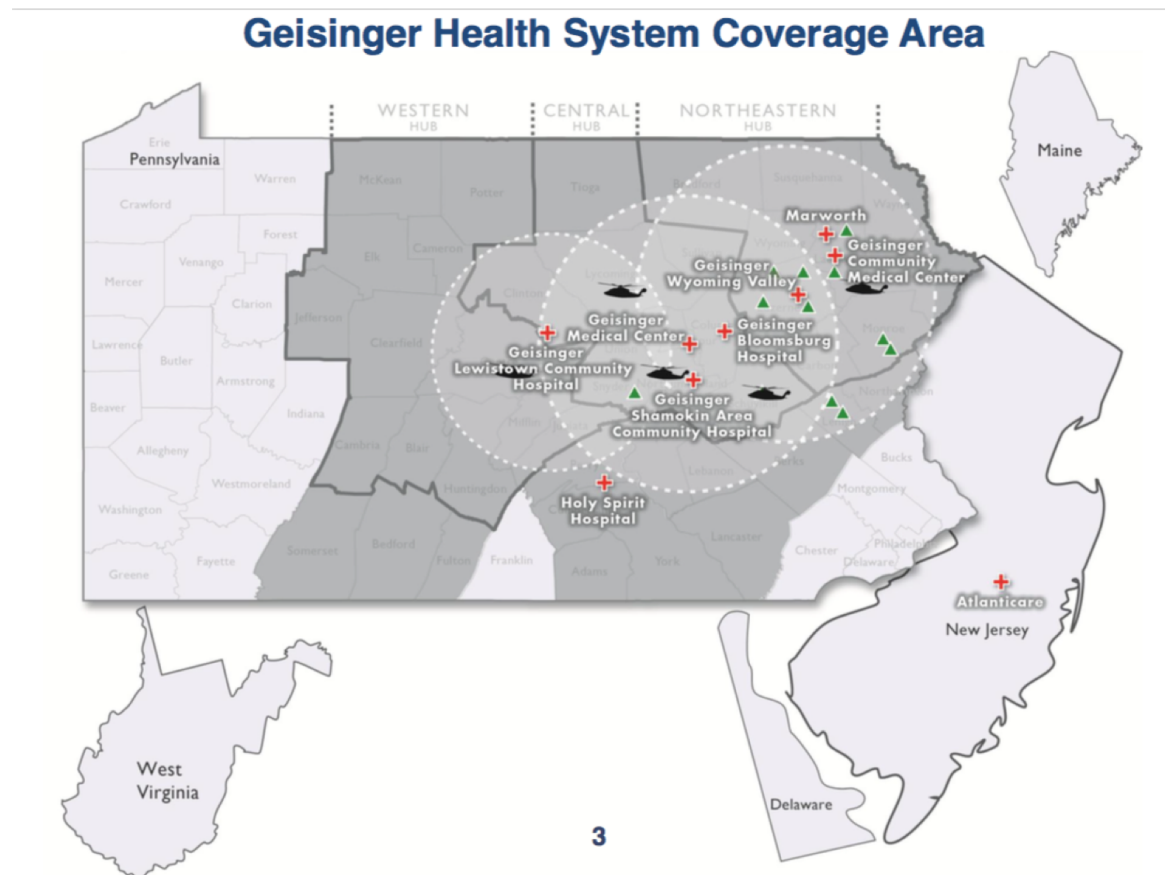

**Figure S1. Geisinger Health System.** Geisinger health system headquartered in Danville, Pennsylvania. The heat map shows the density of patients across different counties in the state of Pennsylvania, who have enrolled Geisinger as primary care.

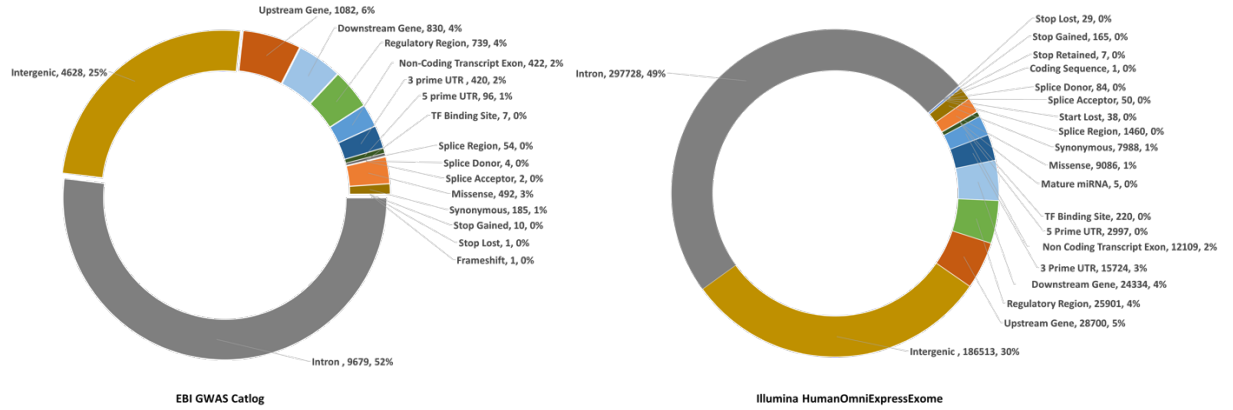

**Figure S2. Comparison of VEP annotations.** In the plot, we show the side by side comparison of the VEP annotations between SNPs from EBI GWAS catalog and the genotyped variants from identified in our study population.

**Table S1.** Summary of 25 clinical lab measures included in the study.

| Phenotype                                 | Transformation | Mean   | Median | Min    | Max    |
|-------------------------------------------|----------------|--------|--------|--------|--------|
| Alanine Aminotransferase                  | Natural Log    | 3.11   | 3.09   | 1.10   | 4.34   |
| Albumin                                   | Natural Log    | 1.44   | 1.46   | 0.59   | 1.69   |
| Alkaline Phosphatase                      | Natural Log    | 4.30   | 4.29   | 2.40   | 5.16   |
| Anion Gap                                 | -              | 10.09  | 10.00  | 5.50   | 14.50  |
| Aspartate Aminotransferase                | Natural Log    | 3.17   | 3.14   | 1.87   | 4.17   |
| Bilirubin                                 | Natural Log    | -0.84  | -0.91  | -6.91  | 0.53   |
| Calcium                                   | -              | 9.40   | 9.40   | 8.55   | 10.25  |
| Carbon dioxide                            | -              | 26.91  | 27.00  | 21.70  | 32.15  |
| Chloride                                  | -              | 102.60 | 103.00 | 97.00  | 108.00 |
| Creatinine                                | Natural Log    | -0.17  | -0.22  | -2.30  | 0.70   |
| Erythrocyte Distribution width (RDW)      | Natural Log    | 2.60   | 2.59   | 2.41   | 2.80   |
| Glucose                                   | Natural Log    | 4.63   | 4.58   | 3.43   | 5.26   |
| Hematocrit                                | -              | 39.97  | 40.00  | 30.30  | 49.45  |
| Hemoglobin                                | -              | 13.52  | 13.50  | 9.95   | 17.05  |
| Mean Corpuscular Hemoglobin Concentration | -              | 33.83  | 33.90  | 31.55  | 36.05  |
| Mean Corpuscular Hemoglobin               | -              | 30.32  | 30.40  | 25.65  | 34.85  |
| Mean Corpuscular Volume                   | -              | 89.57  | 89.60  | 77.70  | 101.25 |
| Platelet Count                            | -              | 241.00 | 238.00 | 83.50  | 404.00 |
| Platelet Mean Volume                      | -              | 9.76   | 9.80   | 6.85   | 12.65  |
| Potassium                                 | -              | 4.25   | 4.25   | 3.55   | 4.95   |
| Protein                                   | -              | 6.99   | 7.00   | 5.95   | 8.00   |
| RBC Count                                 | -              | 4.49   | 4.49   | 3.32   | 5.63   |
| Sodium                                    | -              | 139.60 | 140.00 | 135.00 | 144.00 |

|                      |             |       |       |       |       |
|----------------------|-------------|-------|-------|-------|-------|
| <b>Urea Nitrogen</b> | -           | 15.74 | 15.00 | 2.00  | 32.50 |
| <b>WBC Count</b>     | Natural Log | 1.99  | 1.99  | -6.91 | 5.99  |

**Table S3. Fine mapping chromosome using functional annotations.** The associations of variants in LD haplotype block on chromosome 11 and its functional annotations with most-probable chromatin state and gene correlation from RNA-Seq data.

| Phenotype                         | SNP       | P-Value                 | Gene         | R <sup>2</sup> | Chromatin State (Most Probable) |
|-----------------------------------|-----------|-------------------------|--------------|----------------|---------------------------------|
| Psoriasis (696.1)                 | rs9501032 | 1.4 x 10 <sup>-11</sup> | DDR1         | 0.45           | Enhancer                        |
| Hypercoagulable state (289.81)    | rs2038024 | 4.1 x 10 <sup>-30</sup> | RP1-206D15.5 | 0.17           | Active TSS                      |
| Essential Hypertension (401.9)    | rs964184  | 9.13 x 10 <sup>-5</sup> | APOA1-AS     | 0.22           | Strong Transcription            |
| Coronary Atherosclerosis (414.00) | rs964184  | 6.73 x 10 <sup>-5</sup> | APOA1-AS     | 0.22           | Strong Transcription            |
| Pure Hyperglyceridemia (272.1)    | rs964184  | 6.3 x 10 <sup>-15</sup> | APOA1-AS     | 0.22           | Strong Transcription            |
| Hyperlipidemia (272.4)            | rs964184  | 4.66 x 10 <sup>-8</sup> | APOA1-AS     | 0.22           | Strong Transcription            |
